# Supplementary material
Source: MDPI journal article supplement (https://www.mdpi.com/2624-8549/5/1/39)
Supplement: s1 [file s1]

## **Supplementary Information**

Conversion of Ethanol to Butadiene Over Binary MgO-SiO<sub>2</sub> Mixed Oxides Prepared by the  
Ammonia Evaporation Method

Ismail Bin Samsudin, Stephan Jaenicke and Gaik-Khuan Chuah,\*

Department of Chemistry, National University of Singapore, 3 Science Drive 3, Kent Ridge,  
Singapore 117543

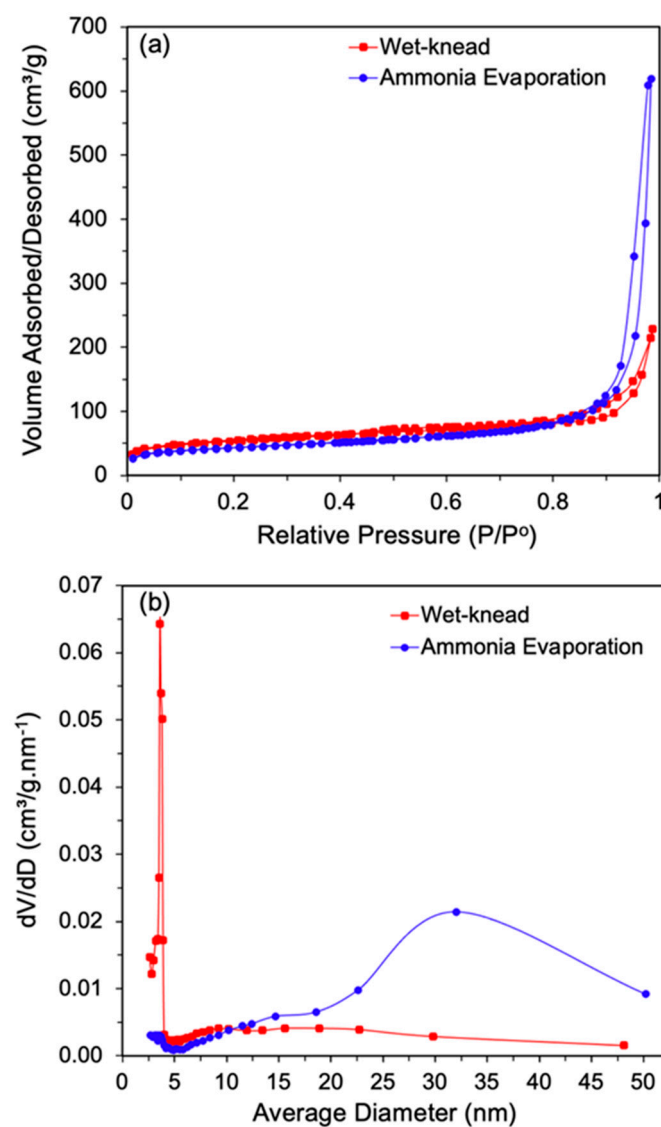

**Figure S1.** (a) Nitrogen sorption isotherms and (b) pore size distributions of SiO<sub>2</sub>-MgO-4 catalysts prepared by ammonia evaporation and wet-knead methods.

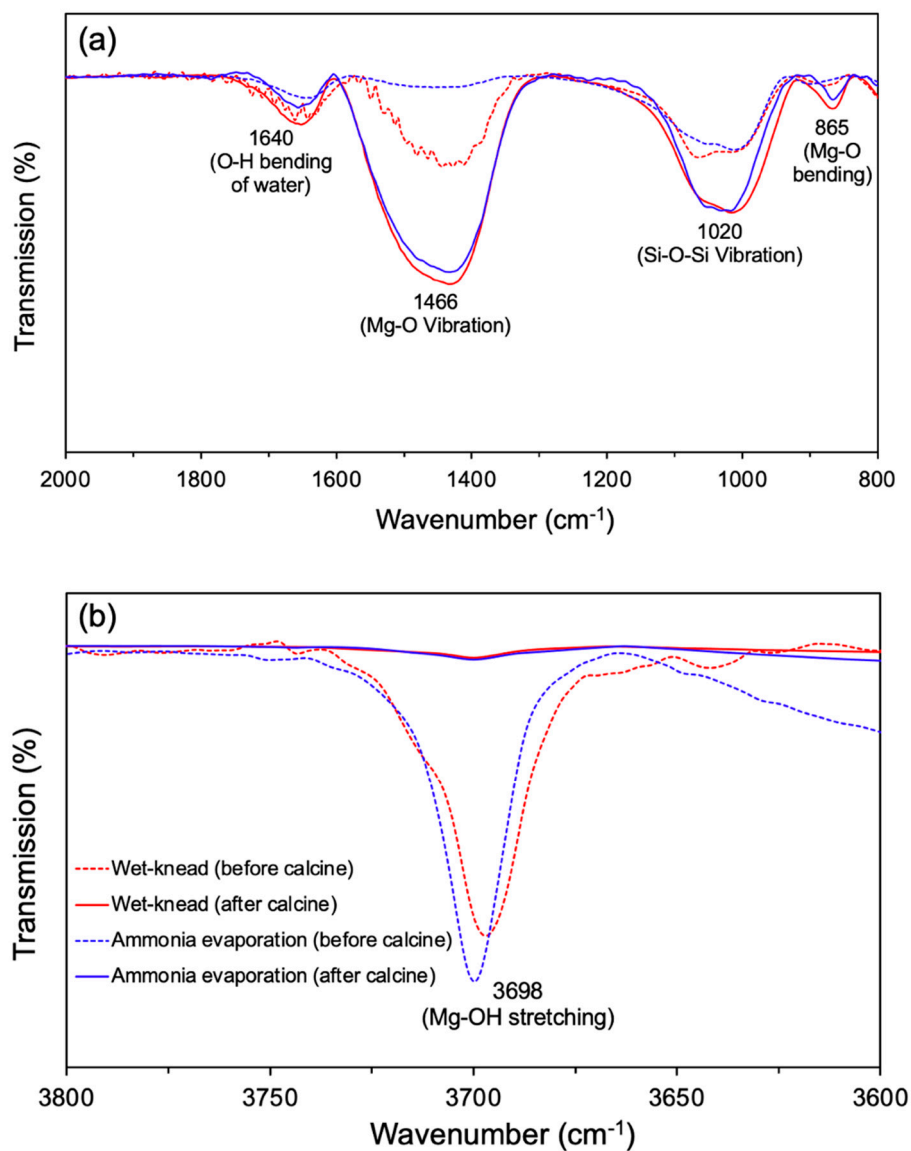

**Figure S2.** FTIR of  $\text{MgO-SiO}_2$  catalysts prepared by ammonia evaporation and wet kneading, before and after calcination at (a) low wavenumbers and (b) high wavenumbers.

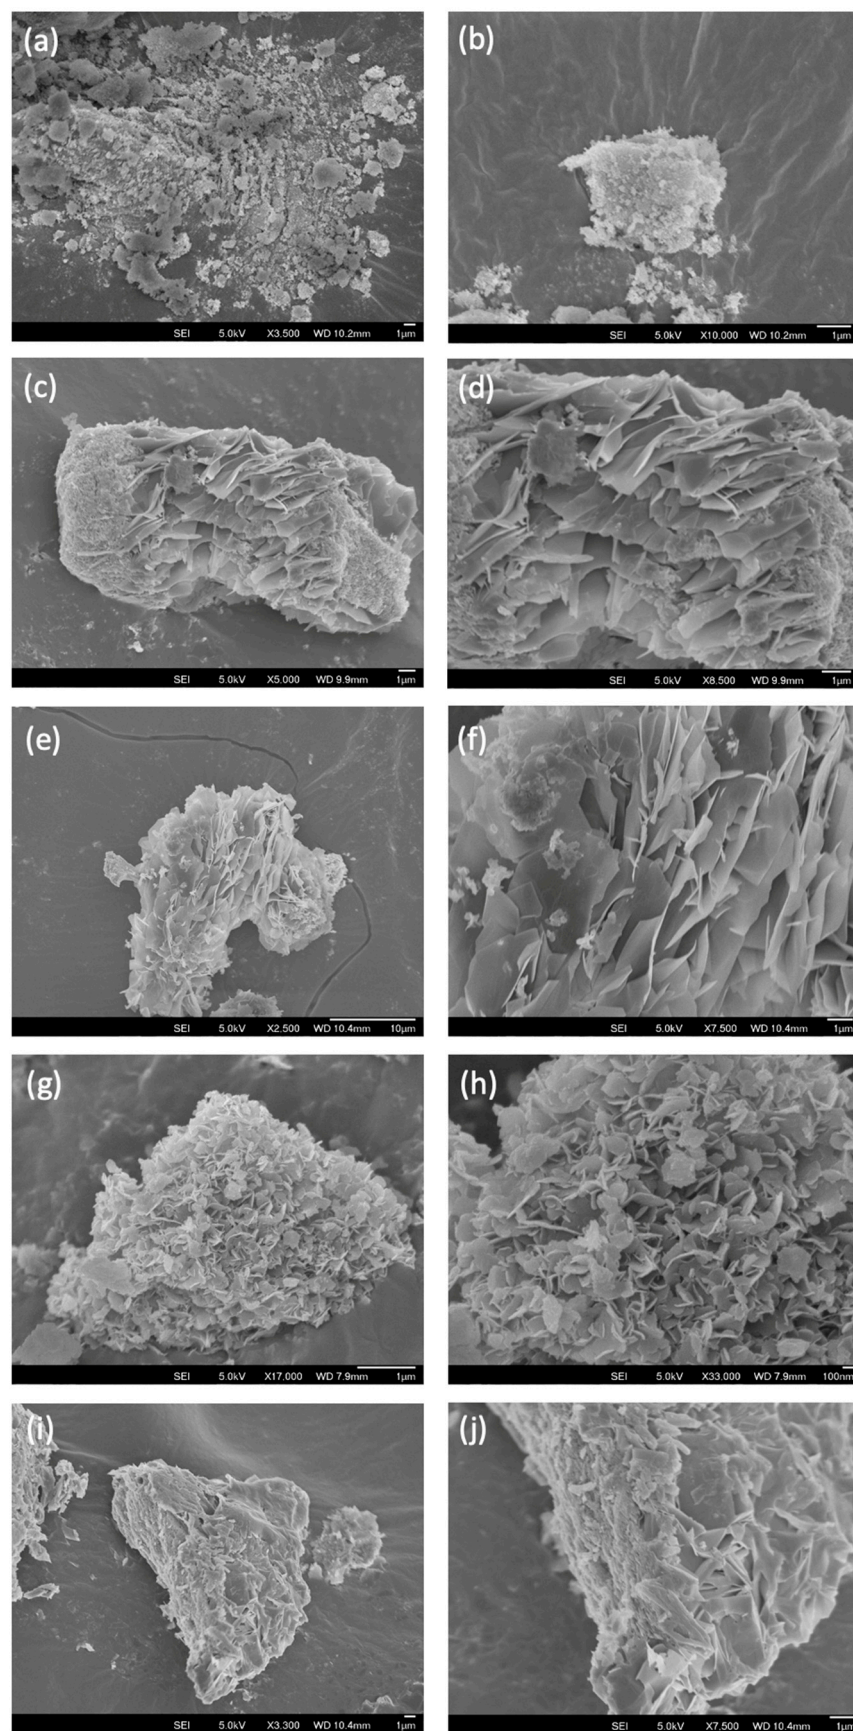

**Figure S3.** FESEM images of (a, b)  $\text{SiO}_2$  and ammonia-evaporated (c, d)  $\text{MgO-SiO}_2\text{-0.5}$ , (e, f)  $\text{MgO-SiO}_2\text{-1}$ , (g, h)  $\text{MgO-SiO}_2\text{-4}$  and (i, j)  $\text{MgO-SiO}_2\text{-10}$ .

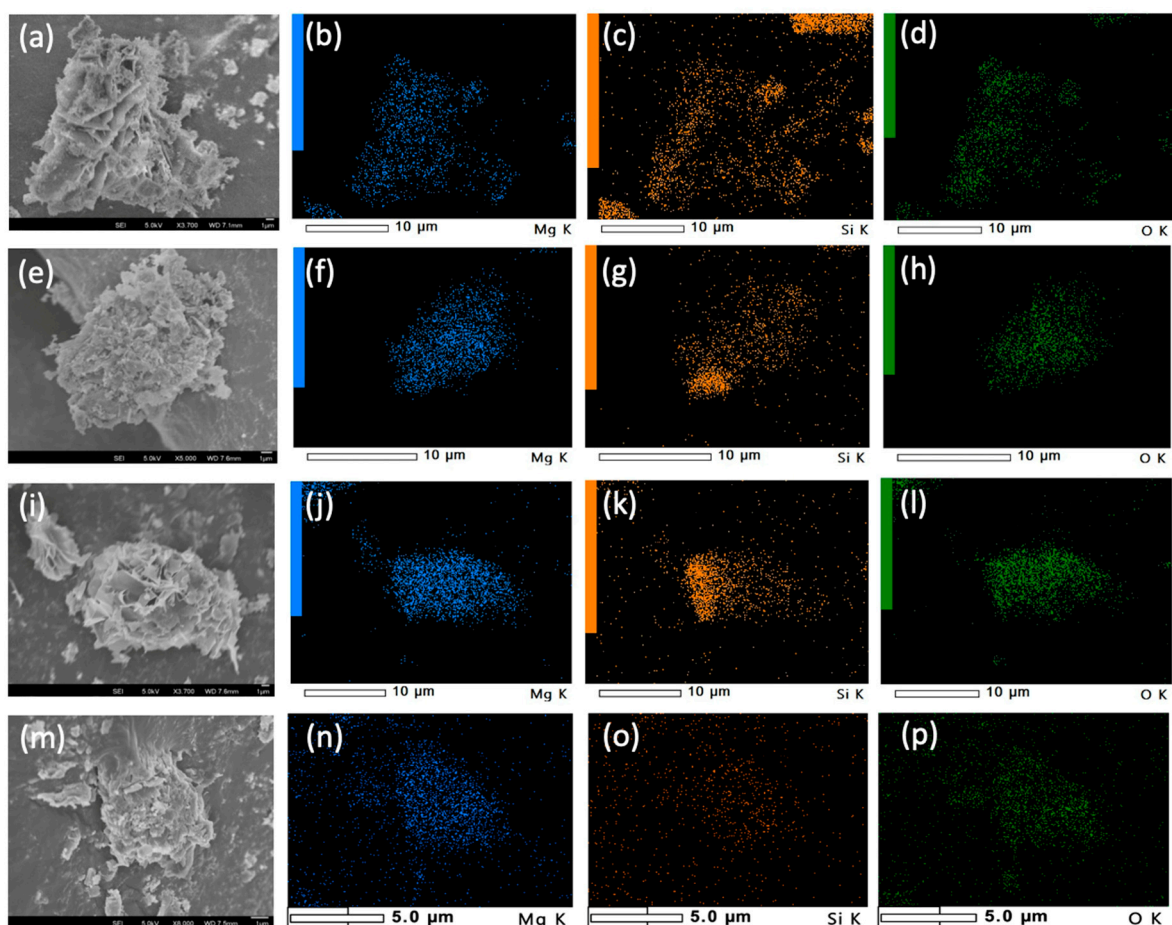

**Figure S4.** SEM/EDS images of (a-d) MgO-SiO<sub>2</sub>-0.5, (e-h) MgO-SiO<sub>2</sub>-1, (i-l) MgO-SiO<sub>2</sub>-4 and (m-p) MgO-SiO<sub>2</sub>-10.

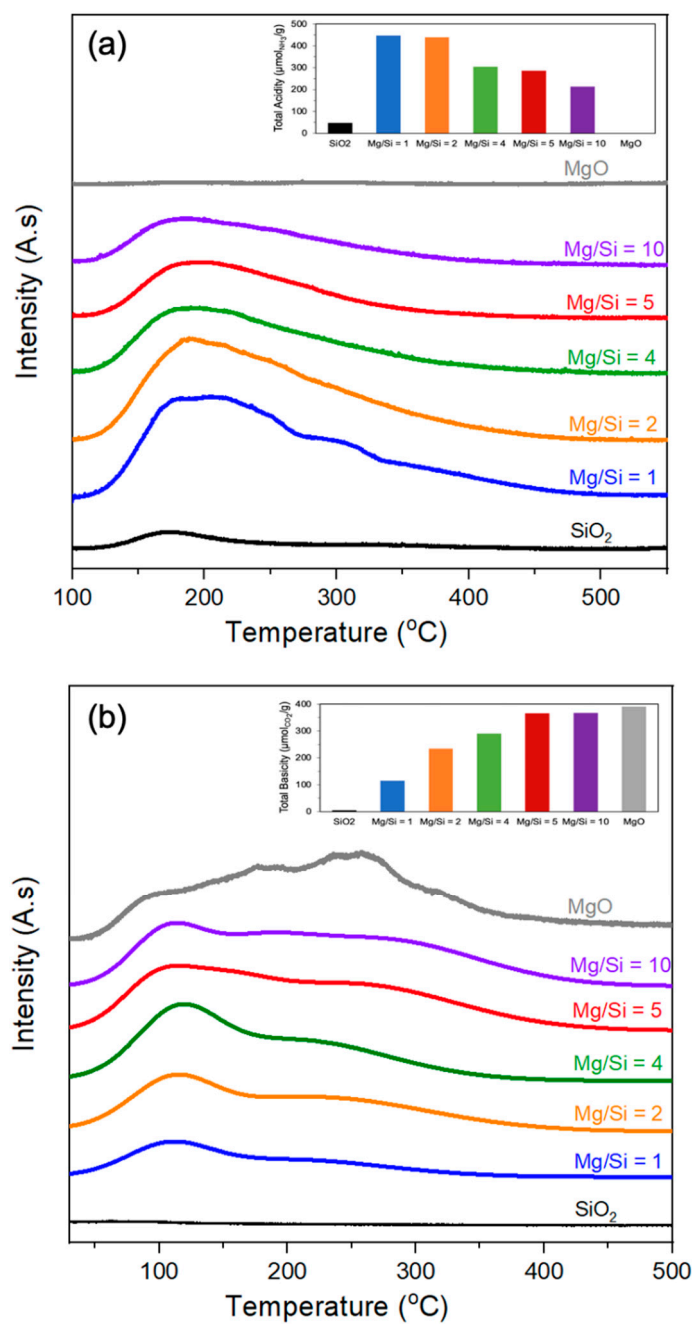

**Figure S5.** TPD of (a) NH<sub>3</sub> and (b) CO<sub>2</sub> over ammonia-evaporated MgO-SiO<sub>2</sub> catalysts, SiO<sub>2</sub> and MgO. Insert: density of (a) basic and (b) acidic sites.

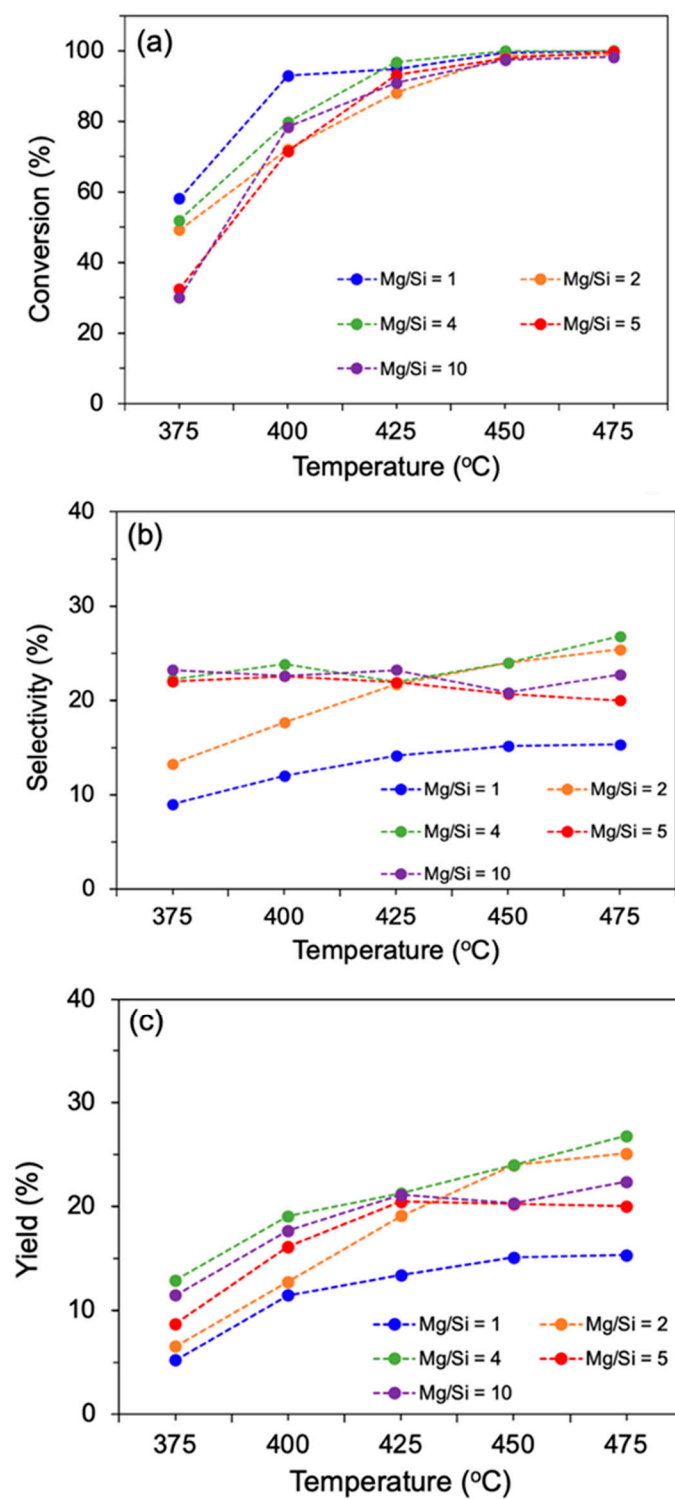

**Figure S6.** (a) Ethanol conversion (b) BD selectivity and (c) BD yield over MgO-SiO<sub>2</sub> (AE) catalysts at varying Mg/Si ratios and temperatures. Reaction conditions: 0.1 g catalyst, 1.5 g glass beads, 100  $\mu$ l/h ethanol (3.2 vol% ethanol), 55 ml/min He, TOS = 4 h.



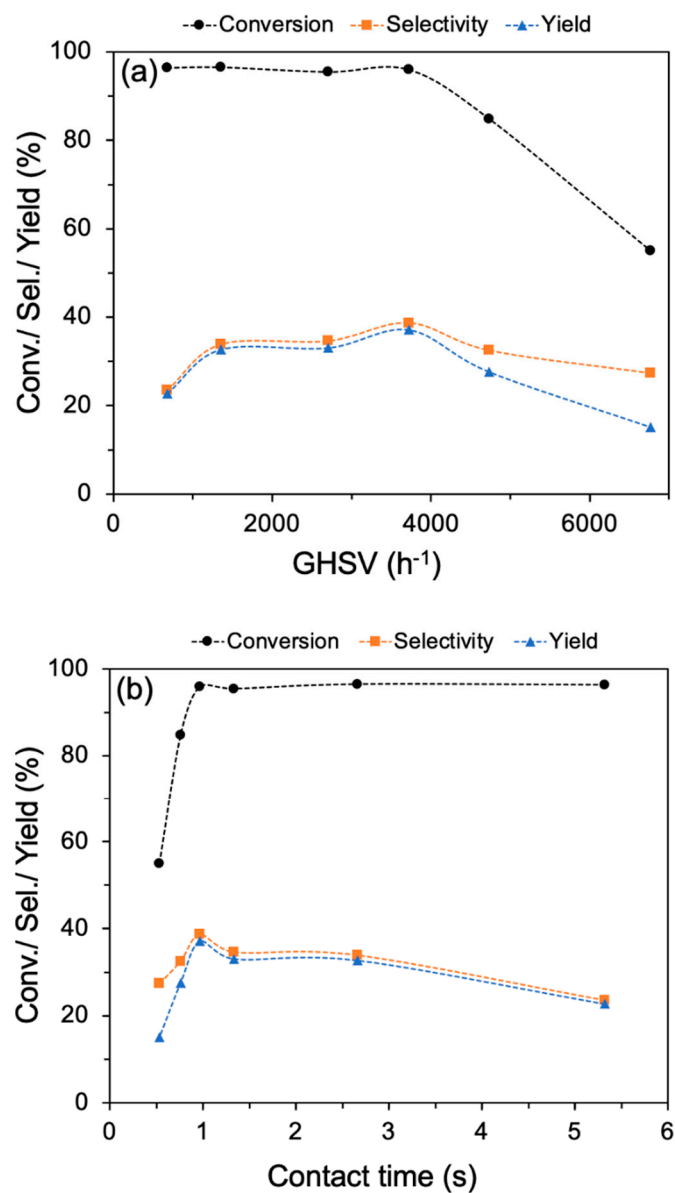

**Figure S7.** Ethanol conversion, BD selectivity and BD yield over MgO-SiO<sub>2</sub>-4 (AE) as a function of (a) GHSV and (b) contact time. Reaction conditions: 0.1 g catalyst, 1.5 g glass beads, 475 °C, 11.3 vol% ethanol.



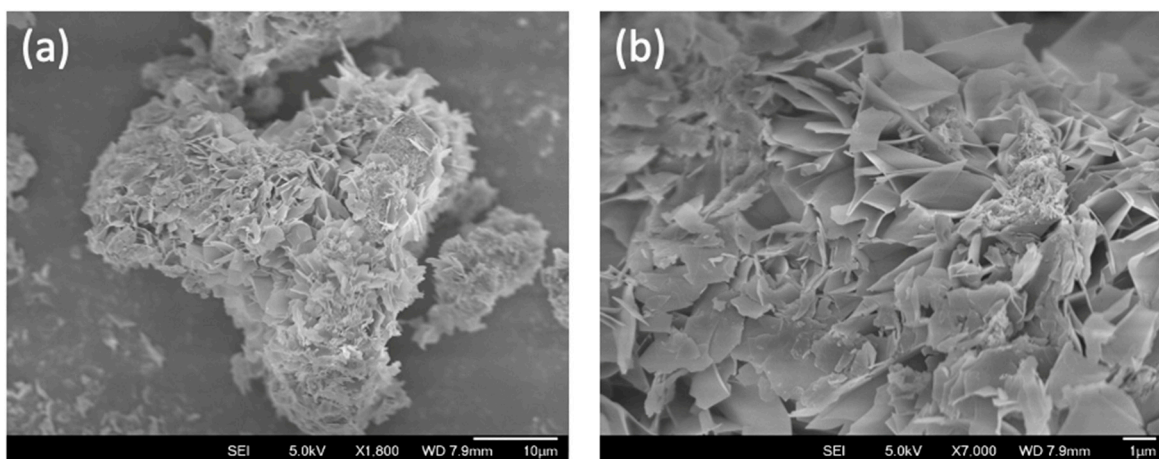

**Figure S8.** SEM images of MgO-SiO<sub>2</sub>-4 (AE) after reaction.

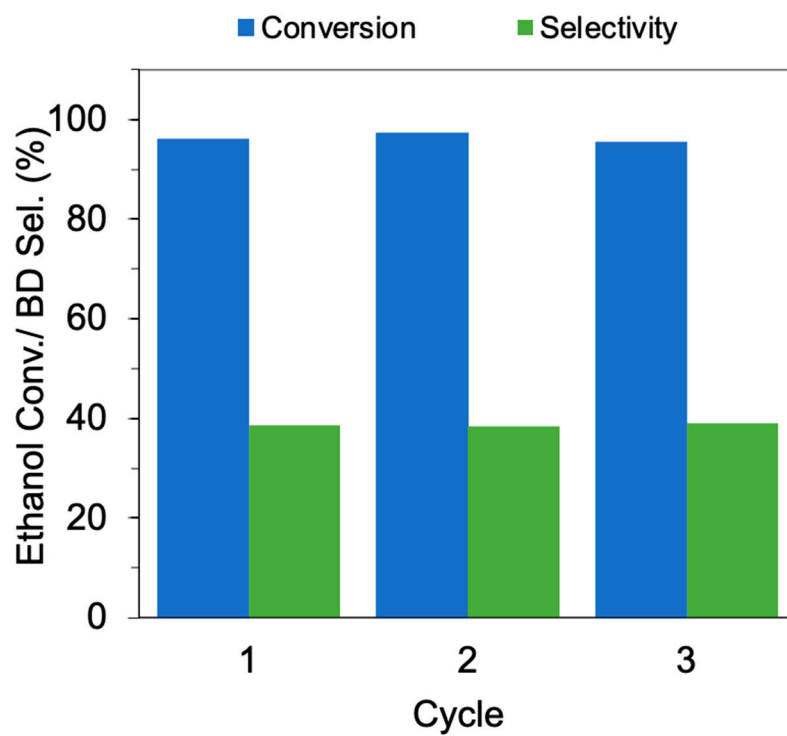

**Figure S9.** Ethanol conversion and butadiene selectivity over MgO-SiO<sub>2</sub>-4. Cycle 1: fresh catalyst, cycles 2 and 3: regenerated catalyst.

**Table S1.** Density of acidic and basic sites from NH<sub>3</sub> and CO<sub>2</sub> TPD

| Sample                        | Number of acidic sites<br>( $\mu\text{mol NH}_3/\text{g}$ ) | Number of basic sites<br>( $\mu\text{mol CO}_2/\text{g}$ ) |
|-------------------------------|-------------------------------------------------------------|------------------------------------------------------------|
| MgO-SiO <sub>2</sub> -1 (AE)  | 447                                                         | 115                                                        |
| MgO-SiO <sub>2</sub> -2 (AE)  | 439                                                         | 235                                                        |
| MgO-SiO <sub>2</sub> -4 (AE)  | 305                                                         | 290                                                        |
| MgO-SiO <sub>2</sub> -5 (AE)  | 286                                                         | 365                                                        |
| MgO-SiO <sub>2</sub> -10 (AE) | 213                                                         | 367                                                        |
| MgO-SiO <sub>2</sub> -4 (WK)  | 362                                                         | 291                                                        |
| MgO                           | 1                                                           | 392                                                        |
| SiO <sub>2</sub>              | 47                                                          | 5                                                          |

**Table S2.** Density of basic and acidic sites of MgO-SiO<sub>2</sub>-4 prepared by wet-kneading and ammonia evaporation.

| Number of acidic sites ( $\mu\text{mol NH}_3/\text{g}$ ) |       |            |            |            |
|----------------------------------------------------------|-------|------------|------------|------------|
|                                                          | Total | Weak       | Moderate   | Strong     |
| MgO-SiO <sub>2</sub> -4 (AE)                             | 305   | 107 (35 %) | 143 (47 %) | 55 (18 %)  |
| MgO-SiO <sub>2</sub> -4 (WK)                             | 362   | 109 (30 %) | 170 (47 %) | 83 (23 %)  |
| Number of basic sites ( $\mu\text{mol CO}_2/\text{g}$ )  |       |            |            |            |
| Sample                                                   | Total | Weak       | Moderate   | Strong     |
| MgO-SiO <sub>2</sub> -4 (AE)                             | 290   | 131 (45 %) | 87 (30 %)  | 72 (25 %)  |
| MgO-SiO <sub>2</sub> -4 (WK)                             | 291   | 81 (28 %)  | 93 (32 %)  | 117 (40 %) |
